# Supplementary material for: Ionic Mechanisms of Endogenous Bursting in CA3 Hippocampal Pyramidal Neurons: A Model Study
Source: PLoS One. 2008 Apr 30;3(4):e2056. doi: 10.1371/journal.pone.0002056 (PMC2323611; doi:10.1371/journal.pone.0002056)
Supplement: Table S2 — Channel kinetics (Hodgkin-Huxley formalism) (0.08 MB DOC) [file pone.0002056.s003.doc]

| **Ion channel** | **Kinetics** | **References** |
| --- | --- | --- |
| **T-type Ca2+ channels** | CaV3.1  n∞=1/(1+exp(-(v+49.3)/4.6))  τn= 0.8+0.025exp(-v/14.5) if v≥-56 mV  τn= 1.71exp((v+120)/38) if v<-56 mV  l∞=1/(1+exp((v+74.2)/5.5))  τl= 12.3+0.12exp(-v/10.8) if v≥-60 mV  τl= 137 if v<-60 mV | Expt data from [10] |
| CaV3.2  n∞=1/(1+exp(-(v+48.4)/5.2))  τn= 1.34+0.035exp(-v/11.8) if v≥-56 mV  τn= 2.44exp((v+120)/40) if v<-56 mV  l∞=1/(1+exp((v+75.6)/6.2))  τl= 18.3+0.005exp(-v/6.2) if v≥-60 mV  τl= 500 if v<-60 mV |
| CaV3.3  n∞=1/(1+exp(-(v+41.5)/6.2))  τn= 7.2+0.02exp(-v/14.7) if v≥-60 mV  τn= 0.875exp((v+120)/41) if v<-60 mV  l∞=1/(1+exp((v+69.8)/6.1))  τl= 79.5+2.0exp(-v/9.3) if v≥-60 mV  τl= 260 if v<-60 mV |
| **N-type Ca2+ channel** | ICaN=gCaN×m2hv(1-[Ca2+]i/[Ca2+]oexp(2Fv/kT))/(1-exp(2Fv/kT))  αm = 0.1967(-v+19.88)/(exp((-v+19.88)/10)-1)  βm = 0.046exp(-v/20.73)  αh = 1.6e-4exp(-v/48.4)  βh = 1/(exp((-v+39)/10)+1) | [11] |
| **L-type Ca2+ channel** | ICaL=gCaL×m2v(1-[Ca2+]i/[Ca2+]oexp(2Fv/kT))/(1-exp(2Fv/kT))  αm = 15.69(-v+81.5)/(exp((-v+81.5)/10)-1)  βm = 0.29exp(-v/10.86) | [11] |
| **Ca2+ dependent AHP K+ channel** | IAHP=gAHP×w8(v-vk)  τw = 1/(1e31[Ca2+]2+0.2)+5.0  w∞= 1e31[Ca2+]2/(1e31[Ca2+]2+0.2) | [12] |
| **Ca2+ dependent K+ channel** | IKC =gKC×o(v-vk)  αo = [Ca2+]×0.28/([Ca2+]+0.48e-3exp( -2×0.84v×F/(RT)));  βo = 0.48/(1+[Ca2+]/(0.13e-6exp(-2v×F/(RT)))) | [13] |
| **Delayed rectifier K+ channel** | IKDR=gKDR×n3×l×(v-vk)  αn=0.03exp(5×0.4(v+32)F/RT)  βn=0.03exp(-5×0.6(v+32)F/RT)  αl=0.001exp(-2(v+61)F/RT)  βl=0.001 | [13] |
| **A-type K+ channel** | IKA=gKA×nl(v-vk)  αn=0.02exp(3×0.6(v+33.6)F/RT)  βn=0.02exp(-1.2(v+33.6)F/RT)  αl=0.08exp(4(v+83)F/RT)  βl=0.08 | [13] |
| **Muscarinic K+ channel** | IKM=gKM×m(v-vk)  αm=0.006exp(10×0.06(v+55)F/RT)  βm=0.006exp(-9.4(v+55)F/RT) | [13] |
